# Supplementary material for: Loss of Stearoyl-CoA Desaturase-1 Improves Insulin Sensitivity in Lean Mice but Worsens Diabetes in Leptin-Deficient Obese Mice
Source: Oxford University Press journal article supplement (doi:10.2337/db06-1142), 2007-04-30
Supplement: onlineappendixdb061142rtpcrprimers.doc [file onlineappendixdb061142rtpcrprimers.doc]

| **Symbol** | Forward 5'-3' | Reverse 5'-3' |
| --- | --- | --- |
| Acadl | TCCATGGCAAAATACTGGGC | TTGCAATCGGGTACTCCCAC |
| Acox | TCTTCTTGAGACAGGGCCCAG | GTTCCGACTAGCCAGGCATG |
| Actb | CCATCCTGCGTCTGGACTTG | TTCCCTCTCAGCTGTGGTGG |
| Angptl4 | CACTCTATCCCACGGCAACG | TGGATCAACAGGGTGGTAGCC |
| Bad | GATGAGCGATGAGTTTGAGGGT | TTTCGATCCCACCAGGACTGG |
| Bax | TGGAGCTGCAGAGGATGATTG | CCCAGTTGAAGTTGCCATCAG |
| Bcl2 | TACCGTCGTGACTTCGCAGAG | CCCCATCCCTGAAGAGTTCC |
| Casp1 | CAGATGCCCACTGCTGATAGG | TGGCACGATTCTCAGCATAGG |
| Casp3 | TCATCCAGTCCCTTTGCAGC | GACTCGAATTCCGTTGCCAC |
| Cd36 | GAGGAGAATGGGCTGTGATCG | CATGTCTCCGACTGGCATGAG |
| Cdkn1a | GTGCCGTTGTCTCTTCGGTC | AAAGTTCCACCGTTCTCGGG |
| Cpt1a | CTTCCAAGGCAGAAGAGTGGG | GAACCTTGGCTGCGGTAAGAC |
| Cpt1b | CGGGACAAAGGCAAGTTCTG | TGCGGACTCGTTGGTACAGG |
| Ddit3 | CTCAAGCAGGAAATCGAGCG | AGGTGATGCCCACTGTTCATG |
| Fasn | TCCTGGGAGGAATGTAAACAGC | CACAAATTCATTCACTGCAGCC |
| Gcg | CCCAGAAGAAGTCGCCATTG | GATGAAGTCCCTGGTGGCAAG |
| Gck | CCTGGCTGTTTTCTTGCCTG | CTGGAATGTTTGTGGCCTGG |
| G6pase | TCAACTCCAGCATGTACCGGA | AGGACCAAGGAAGCCACAATG |
| Gpr40 | CCCCTTCTGCCCAGTCTTTG | CAGCGCTGAGAGCAGCTAGG |
| Hadhsc | TTGAGGCCGTCAGGCTACAC | AGAAGCTCAAACGGACCCATG |
| Hmgcs1 | ATCGTGTTGGGCAGGGTACA | TCCAGCGCCATCTCTCAGT |
| Hspa5 | ATGATGCCCAGCGACAAGC | CCAGGCCATATGCAATAGCAG |
| Ins2 | CGTGGCTTCTTCTACACACCCAT | TCTGAAGGTCACCTGCTCCC |
| Ipf1 | GCCTCTGAGGACTCTTTCCTGG | TGCTGGTCCGTATTGGAACG |
| Irs2 | GGCTTGAAGCGGCTAAGTCTC | ACGGATGACCTTAGCACCCC |
| Ldlr | CTGCAGCCAGCTCTGTGTGA | CCTGGTGTGTGGGTCCATGT |
| Lipe | TCAAGCCAAGGTGTCCTCCA | GGCCAGCAGAGGAGACATGA |
| Lpl | TCCAGCAGCAAAGCAGAAGG | AGCCAAACTCCCAGGACCAC |
| Pepck | CCCCTTGTCTATGAAGCCCTCA | GCCCTTGTGTTCTGCAG |
| Pltp | CAGGCACCACCATCTCCATC | TGAGACGGCCTTCCATGATC |
| Ppara | ATTTGCTGTGGAGATCGGCC | TGGTTGCTCTGCAGGTGGAG |
| Pparg | TGAACGTGAAGCCCATCGAG | CTTGGCGAACAGCTGAGAGG |
| Ppargc1a | TCGATGTGTCGCCTTCTTGC | ACGAGAGCGCATCCTTTGG |
| Scd2 | ACCCAGCTGTCAACACTGTTGC | AGTATTGTTAGGCGAAATGCCC |
| Slc2a2 | CCCTTGGTTCATGGTTGCTG | GGGCGATGACAAAATTGCAG |
| Sptlc1 | AGAGCTACAGAGGGCTGCATCC | TAGTTCCGTCCGCAGGTGAC |
| Sptlc2 | TCACAAAGAGCTTCGGTGCTTC | GACATCGACGTGGCATACACAG |
| Srebp1 | AACCACCGTCACTTCCAGCTAG | TGGTCCTGATTGCTTGTCAGG |
| Srebp1c | ATCGGCGCGGAAGCTGT | AGCATGTCTTCAAATGTGCAATC |
| Tnf | TGGCCTCTCTACCTTGTTGCC | GACAGCCTGGTCACCAAATCAG |
| Ucp2 | TACCAATCTCGGGAGGCACC | ATGGGACTGGGCAGAGGATG |
